# Supplementary material
Source: ML conference proceedings conference paper supplement (https://openaccess.thecvf.com/content/CVPR2023/html/Bokhovkin_Neural_Part_Priors_CVPR_2023_paper.html)
Supplement: Supplementary file 1 [file Bokhovkin_Neural_Part_Priors_CVPR_2023_supplemental.pdf]

In this supplemental material, we provide additional qualitative results in Section A, evaluation details in Section B, additional per-part evaluation in Section C, additional ablation discussion with qualitative visualizations for ablations in Section D, visualization of part interpolations through learned latent part spaces in Section E, part specifications per category in Section F, and implementation details with the description of the network architecture in Section G.

## A. Additional qualitative analysis

In Figures 5, 6 and 7, we show additional qualitative results and comparison of NPPs to baseline methods. We can see that StructureNet [35] and Bokhovkin et al. [3] often produce incomplete and inaccurate shapes, can include inconsistent parts (e.g. predicting only one chair arm or predicting two types of legs for one chair). The advanced point cloud segmentation method PointGroup [30] is able to predict consistent part types for shapes but produces fairly noisy geometry for these parts. In addition, when comparing to baselines and NPPs without applying scene-aware constraints, we can clearly see a large amount of diversity within shapes that should be similar or identical within one scan.

Several categories can be more challenging, due to more often appearing with clutter (e.g., tables often have objects on top vs chairs or trash cans); our learned manifolds help to regularize this during TTO. In Fig. 8, we show common failure cases that NPPs produces for different shape categories. Parts with little geometric distinction (e.g., cabinet frame vs drawer often both lie on a flat plane) can be more difficult to optimize, due to more challenging segmentation. The most left case with the cabinet shows erroneous detection (too small), along with an excess wrong part prediction of a cabinet base on the bottom. Missing scanned legs of the chair result in the incorrect type of reconstructed chair legs, while the 4-spoke swivel chair is ground truth. Dense

segmentation of real-world scans is often significantly challenging, tending to segment parts of the floor as chair legs, parts of the wall as a bed headboard, or treating a full trash bin as a bin with a top cover part.

## B. Evaluation details

For semantic part completion and part segmentation evaluation, we sample 10,000 points per part from predicted and ground-truth mesh surfaces (within the corresponding MLCVNet bounding box) and transform them to the ScanNet coordinate space. The Chamfer Distance metric is evaluated for every pair of semantically matching parts between predicted and ground-truth meshes. In case there exists a part in a ground-truth mesh that is missing for a predicted mesh or vice versa, we use the center of the mesh as a missing part. After each part is evaluated, we average scores to obtain the final score for a full object.

For segmentation evaluation, we project labels from sampled points onto ScanNet mesh vertices to obtain the set of points not depending on a method. Here, to compute segmentation Chamfer Distance for an object, the predicted and ground-truth projected labeled points are used to get per-part scores and then averaged. For one part IoU evaluation, the corresponding projected points are marked as ones and the rest as zeros, intersection and union scores are computed using these 0-1 sets. We similarly use 10,000 sampled points per part for these metrics.

## C. Per-part evaluation

We provide per-part semantic part completion and part segmentation in Tab. 4, 5, 6, and 7. Our learned part manifolds enable more robust, accurate geometry reconstruction also for individual parts.

| Method                                      | Chamfer Distance ( $\downarrow$ ) – Accuracy |              |              |              |              |              |              |               |              |              |              |              |              |              |              |              |              |              |              |
|---------------------------------------------|----------------------------------------------|--------------|--------------|--------------|--------------|--------------|--------------|---------------|--------------|--------------|--------------|--------------|--------------|--------------|--------------|--------------|--------------|--------------|--------------|
|                                             | chair                                        |              |              |              |              |              |              | table         |              |              |              |              | cabinet      |              |              |              |              |              |              |
|                                             | left arm                                     | right arm    | back         | seat         | reg. leg     | star leg     | surf. base   | central supp. | drawer       | leg          | pedestal     | shelf        | surface      | side panel   | door         | shelf        | frame        | base         | countertop   |
| SG-NN [12] + MLCVNet [55] + PointGroup [30] | 0.081                                        | 0.075        | 0.045        | 0.012        | 0.022        | 0.099        | 0.200        | 0.164         | 0.204        | <b>0.044</b> | 0.245        | 0.174        | 0.024        | 0.204        | 0.150        | 0.124        | <b>0.010</b> | 0.376        | 0.344        |
| MLCVNet [55] + StructureNet [35]            | 0.041                                        | 0.036        | 0.005        | 0.008        | <b>0.020</b> | 0.100        | 0.223        | 0.123         | <b>0.021</b> | 0.105        | 0.167        | <b>0.041</b> | 0.022        | 0.169        | 0.104        | <b>0.033</b> | 0.028        | 0.268        | 0.344        |
| Bokhovkin et al. [3]                        | 0.039                                        | 0.039        | 0.008        | 0.008        | 0.057        | 0.074        | 0.110        | 0.044         | 0.094        | 0.141        | 0.167        | 0.121        | 0.024        | 0.175        | 0.083        | 0.066        | 0.032        | 0.210        | <b>0.229</b> |
| <b>Ours</b>                                 | <b>0.015</b>                                 | <b>0.015</b> | <b>0.002</b> | <b>0.003</b> | 0.026        | <b>0.058</b> | <b>0.081</b> | <b>0.042</b>  | 0.143        | 0.077        | <b>0.101</b> | 0.146        | <b>0.006</b> | <b>0.164</b> | <b>0.042</b> | 0.078        | 0.017        | <b>0.207</b> | 0.306        |

Table 4. Per-part evaluation of semantic part completion for ‘chair’, ‘table’, and ‘cabinet’ categories on Scan2CAD [1] in comparison to state-of-the-art part segmentation [30,35] and semantic part completion [3].

| Method                                      | Chamfer Distance ( $\downarrow$ ) – Accuracy |              |              |              |              |              |              |              |              |              |              |              |              |              |              |
|---------------------------------------------|----------------------------------------------|--------------|--------------|--------------|--------------|--------------|--------------|--------------|--------------|--------------|--------------|--------------|--------------|--------------|--------------|
|                                             | bookshelf                                    |              |              |              | bed          |              |              |              | bin          |              |              |              |              |              |              |
|                                             | door                                         | shelf        | frame        | base         | frame        | side surf.   | sleep area   | headboard    | base         | bottom       | box          | cover        | frame        | class avg.   | inst. avg.   |
| SG-NN [12] + MLCVNet [55] + PointGroup [30] | 0.097                                        | 0.245        | <b>0.005</b> | 1.298        | 0.059        | 0.776        | <b>0.009</b> | 0.890        | 0.191        | 0.072        | <b>0.001</b> | 0.133        | 0.049        | 0.201        | 0.077        |
| MLCVNet [55] + StructureNet [35]            | 0.070                                        | 0.186        | 0.045        | 1.161        | 0.081        | 0.776        | 0.047        | 1.375        | 0.191        | 0.044        | 0.003        | 0.126        | 0.049        | 0.188        | 0.055        |
| Bokhovkin et al. [3]                        | 0.041                                        | 0.137        | 0.090        | <b>0.858</b> | 0.073        | 0.485        | 0.127        | 0.508        | 0.131        | 0.038        | 0.004        | 0.042        | 0.041        | 0.134        | 0.054        |
| <b>Ours</b>                                 | <b>0.037</b>                                 | <b>0.079</b> | 0.068        | 1.298        | <b>0.020</b> | <b>0.290</b> | 0.051        | <b>0.365</b> | <b>0.111</b> | <b>0.020</b> | 0.002        | <b>0.012</b> | <b>0.037</b> | <b>0.123</b> | <b>0.033</b> |

Table 5. Per-part evaluation of semantic part completion for ‘bookshelf’, ‘bed’, and ‘bin’ categories on Scan2CAD [1] in comparison to state-of-the-art part segmentation [30,35] and semantic part completion [3].

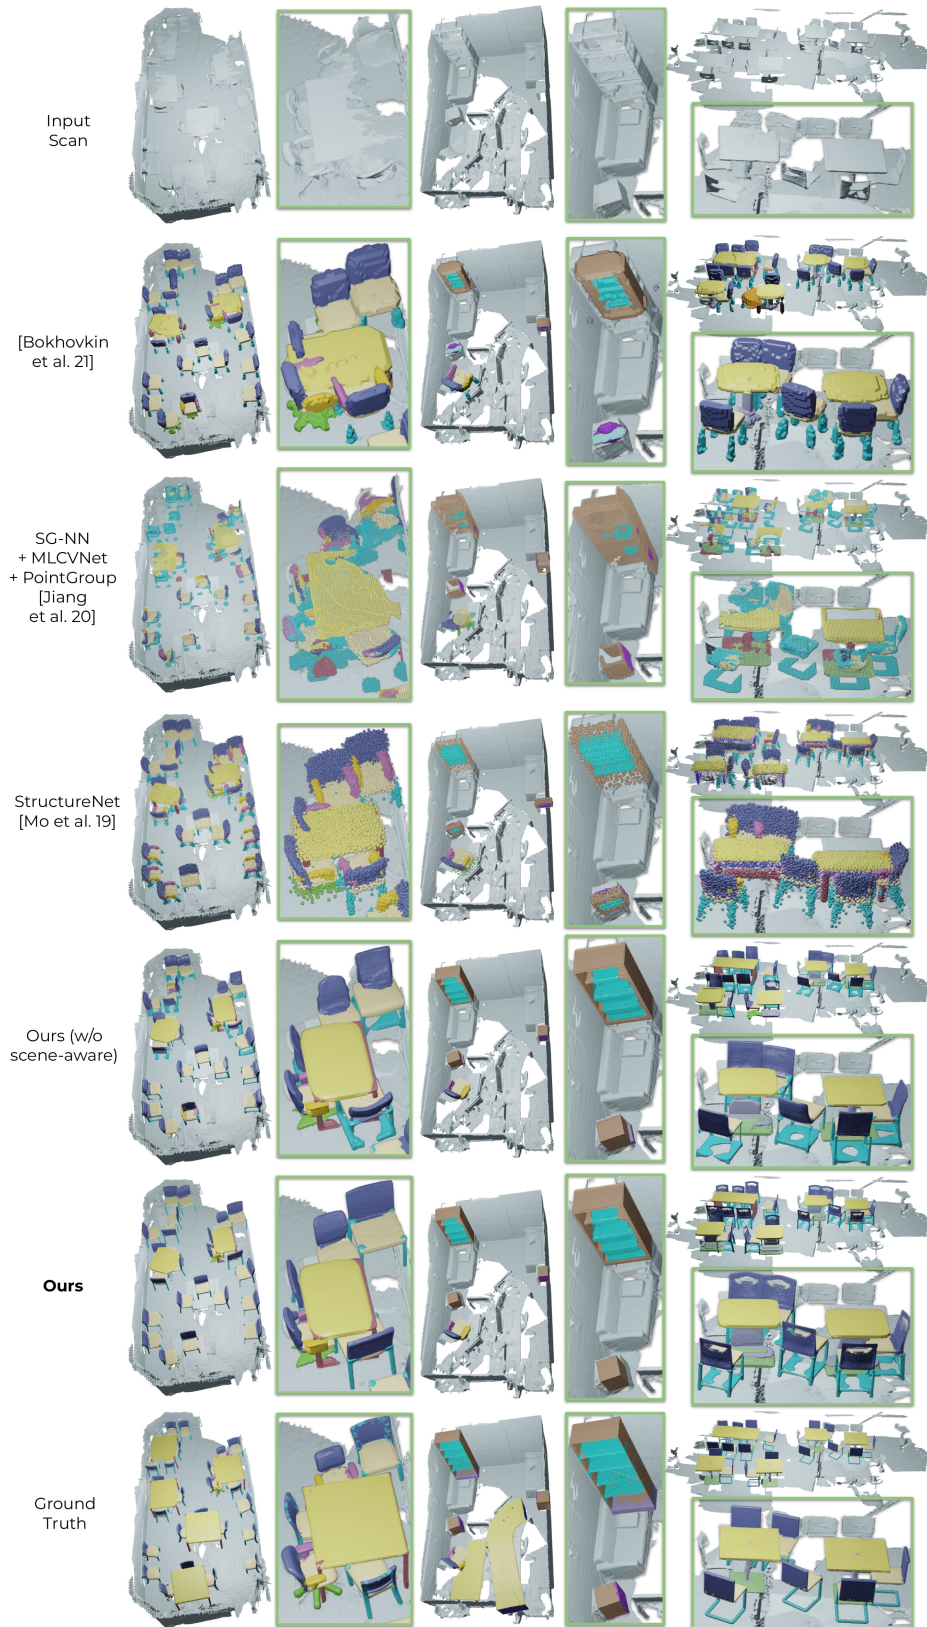

Figure 5. Additional qualitative comparison of NPPs with point [30, 35] and voxel-based [3] state of the art on ScanNet scans with Scan2CAD+PartNet ground truth.

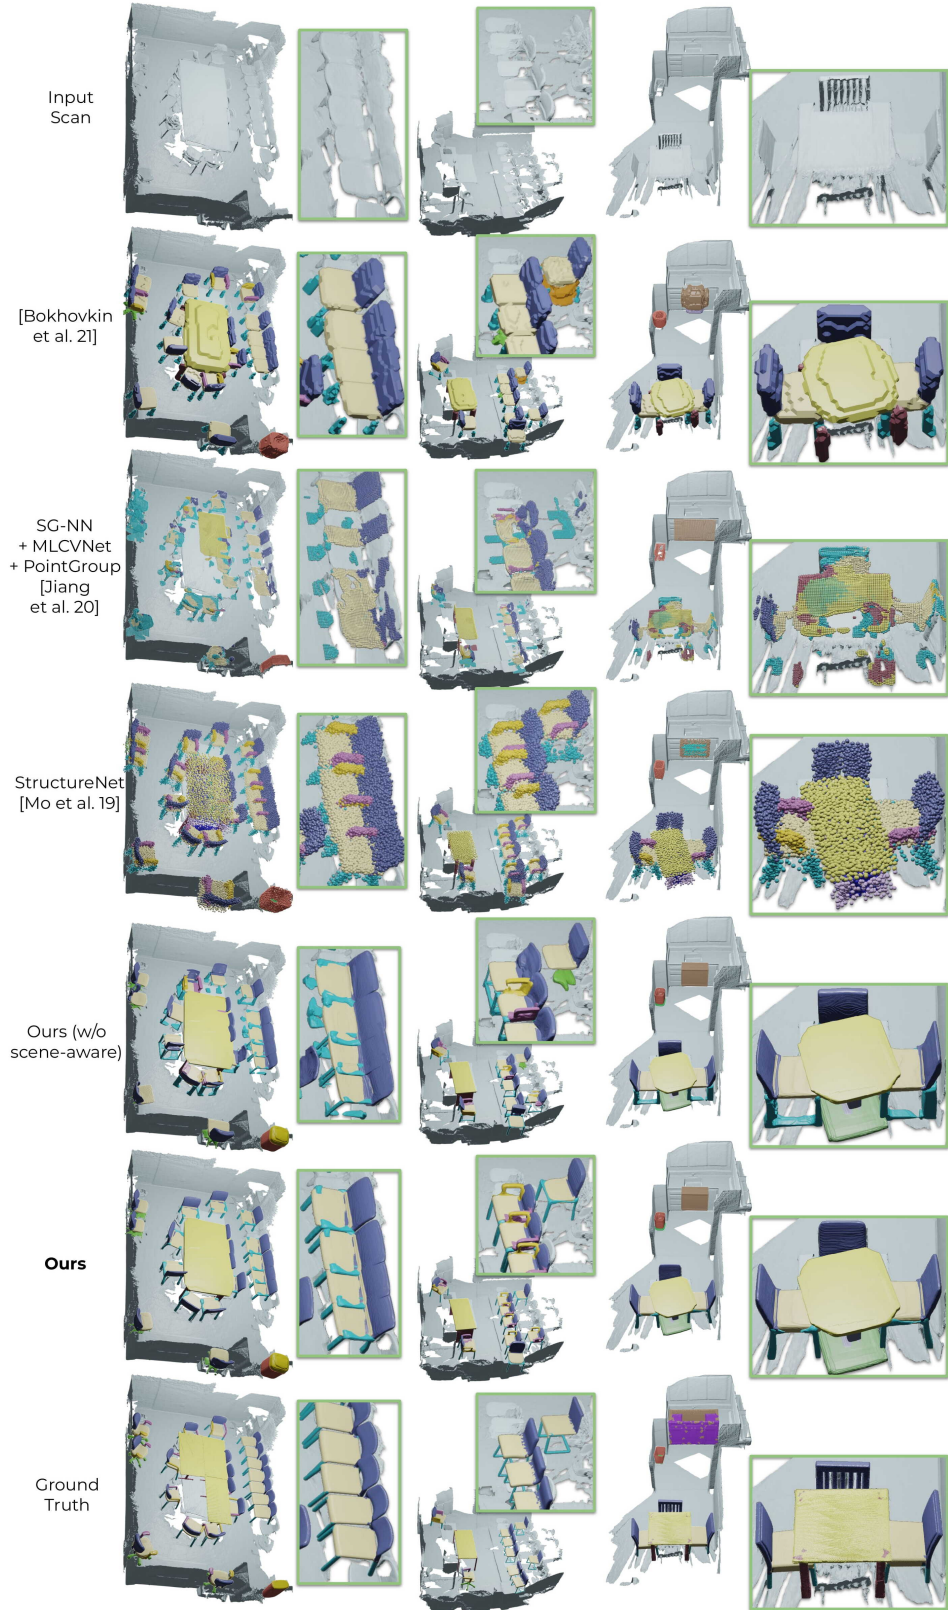

Figure 6. Additional qualitative comparison of NPPs with point [30, 35] and voxel-based [3] state of the art on ScanNet scans with Scan2CAD+PartNet ground truth.



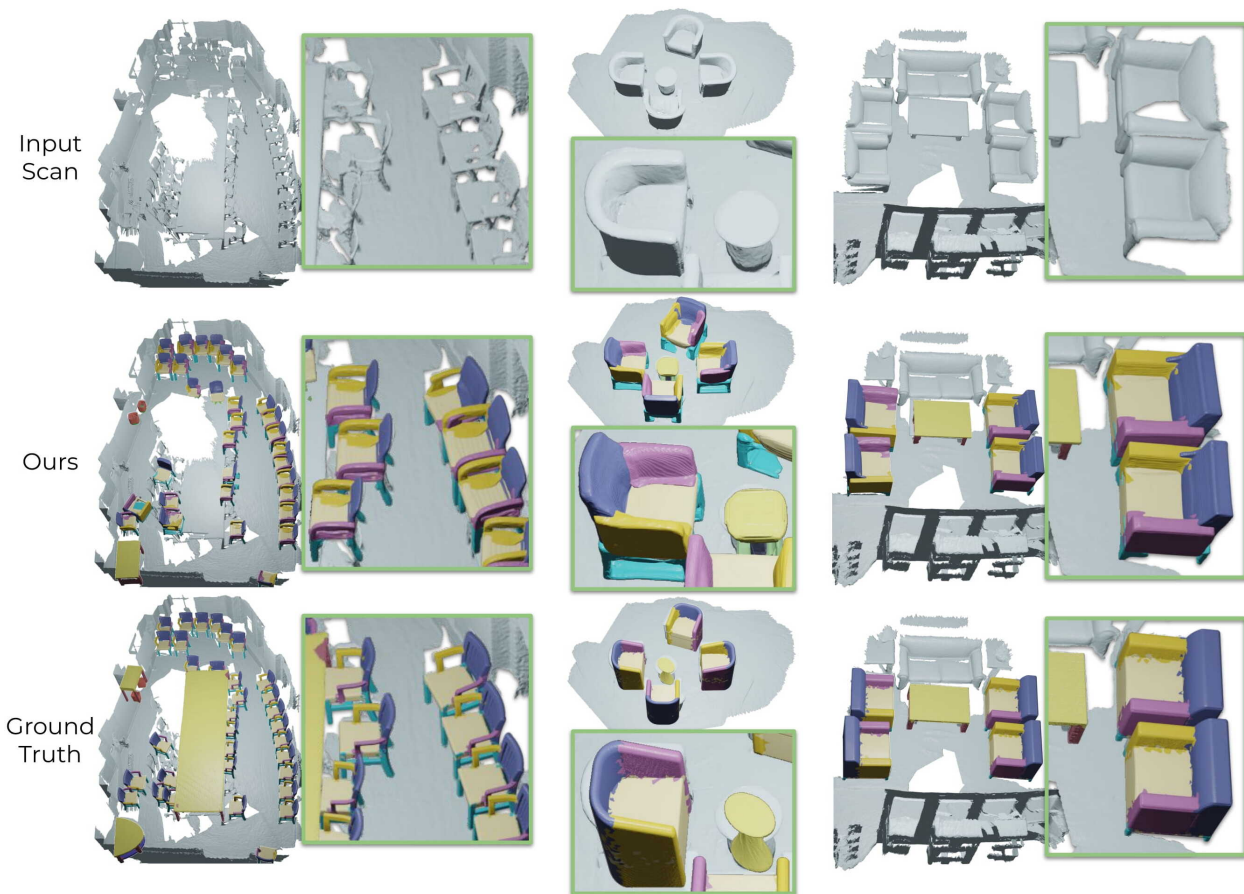

Figure 7. Additional qualitative results on ScanNet [11] with Scan2CAD [1] and PartNet [36] targets, showing our consistent, complete part decompositions.

| Method                                      | Chamfer Distance ( $\downarrow$ ) – Completion |              |              |              |              |              |              |               |              |              |              |              |              |              |              |              |              |              |              |
|---------------------------------------------|------------------------------------------------|--------------|--------------|--------------|--------------|--------------|--------------|---------------|--------------|--------------|--------------|--------------|--------------|--------------|--------------|--------------|--------------|--------------|--------------|
|                                             | chair                                          |              |              |              |              |              | table        |               |              |              |              | cabinet      |              |              |              |              |              |              |              |
|                                             | left arm                                       | right arm    | back         | seat         | reg. leg     | star leg     | surf. base   | central supp. | drawer       | leg          | pedestal     | shelf        | surface      | side panel   | door         | shelf        | frame        | base         | countertop   |
| SG-NN [12] + MLCVNet [55] + PointGroup [30] | 0.096                                          | 0.086        | 0.041        | 0.014        | 0.054        | 0.063        | 0.161        | 0.152         | 0.137        | <b>0.092</b> | 0.305        | 0.151        | 0.050        | 0.203        | 0.081        | 0.140        | <b>0.043</b> | 0.384        | 0.156        |
| MLCVNet [55] + StructureNet [35]            | 0.051                                          | 0.049        | 0.008        | 0.008        | 0.035        | 0.049        | 0.126        | 0.062         | 0.194        | 0.158        | <b>0.148</b> | <b>0.102</b> | 0.037        | 0.246        | 0.104        | <b>0.085</b> | 0.061        | 0.298        | 0.156        |
| Bokhovkin et al. [3]                        | 0.046                                          | 0.049        | 0.012        | 0.011        | 0.056        | 0.057        | 0.139        | 0.078         | 0.149        | 0.165        | <b>0.148</b> | 0.106        | 0.045        | <b>0.181</b> | 0.094        | 0.111        | 0.062        | <b>0.219</b> | <b>0.111</b> |
| <b>Ours</b>                                 | <b>0.043</b>                                   | <b>0.040</b> | <b>0.006</b> | <b>0.005</b> | <b>0.032</b> | <b>0.031</b> | <b>0.120</b> | <b>0.044</b>  | <b>0.135</b> | 0.118        | <b>0.148</b> | 0.116        | <b>0.026</b> | <b>0.181</b> | <b>0.071</b> | 0.159        | 0.064        | 0.266        | 0.152        |

Table 6. Per-part evaluation of part segmentation for 'chair', 'table', and 'cabinet' categories on Scan2CAD [1] in comparison to state-of-the-art part segmentation [30, 35] and semantic part completion [3].

| Method                                      | Chamfer Distance ( $\downarrow$ ) – Completion |              |              |              |              |              |              |              |              |              |              |              |              |              |              |
|---------------------------------------------|------------------------------------------------|--------------|--------------|--------------|--------------|--------------|--------------|--------------|--------------|--------------|--------------|--------------|--------------|--------------|--------------|
|                                             | bookshelf                                      |              |              |              | bed          |              |              |              | bin          |              |              |              |              |              |              |
|                                             | door                                           | shelf        | frame        | base         | frame        | side surf.   | sleep area   | headboard    | base         | bottom       | box          | cover        | frame        | class avg.   | inst. avg.   |
| SG-NN [12] + MLCVNet [55] + PointGroup [30] | 0.348                                          | 0.143        | <b>0.020</b> | 1.066        | 0.072        | 0.567        | 0.043        | 0.999        | 0.284        | 0.077        | <b>0.004</b> | 0.093        | 0.038        | 0.193        | 0.084        |
| MLCVNet [55] + StructureNet [35]            | <b>0.173</b>                                   | 0.131        | 0.071        | 0.942        | 0.077        | 0.567        | 0.057        | 1.122        | 0.284        | 0.052        | 0.007        | 0.096        | 0.038        | 0.175        | 0.062        |
| Bokhovkin et al. [3]                        | 0.361                                          | <b>0.095</b> | 0.096        | <b>0.754</b> | 0.068        | 0.505        | 0.109        | 0.507        | <b>0.153</b> | 0.050        | 0.008        | 0.045        | 0.036        | 0.144        | 0.056        |
| <b>Ours</b>                                 | 0.520                                          | 0.130        | 0.119        | 1.066        | <b>0.034</b> | <b>0.221</b> | <b>0.038</b> | <b>0.365</b> | 0.167        | <b>0.029</b> | <b>0.004</b> | <b>0.020</b> | <b>0.033</b> | <b>0.140</b> | <b>0.043</b> |

Table 7. Per-part evaluation of part segmentation for 'bookshelf', 'bed', and 'bin' categories on Scan2CAD [1] in comparison to state-of-the-art part segmentation [30, 35] and semantic part completion [3].

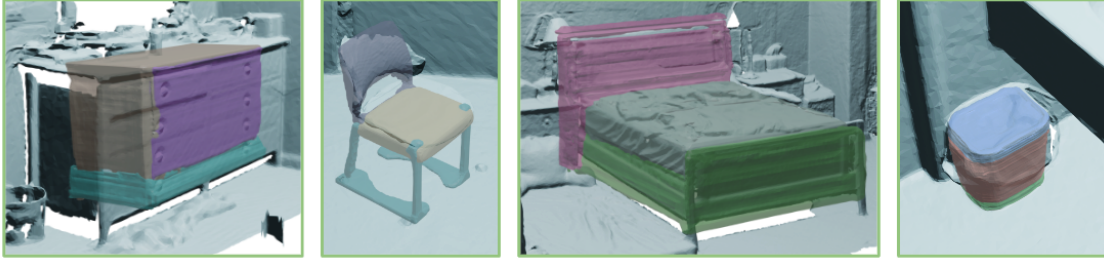

Figure 8. Common failure cases for different shape categories produced by NPPs.

## D. Additional ablation discussion

In Tab. 8 we compare results without Scene Consistency constraints to ours only for the instances affected by these constraints. Evaluated only on  $\sim 66\%$  of instances and  $\sim 57\%$  of corresponding ScanNet scenes, NPPs outperform the results without Scene Consistency constraints by a greater gap compared to Tab. 3.

In Fig. 9 we show the qualitative ablation results corresponding to Tab. 3. Compared to quantitative results of scene-aware constraint ablation, we see a more noticeable effect in qualitative effect, with much more consistent part decompositions for similar objects in a scene, even when seen under fairly different partial views (i.e., matching left and right chair arms, consistent joint of the table surface and the table stand).

Without latent projection, arbitrary initializations for TTO often land outside the basin of convergence (i.e., starting with too discrepant parts for the trash bin and the cabinet), resulting in poorer performance, as low-level geometric constraints may be ambiguous for resolving large structural differences. TTO then improves significantly the fitting accuracy enabling the prediction of geometry that lies outside of the learned manifold (i.e., round table surface, missing pillows on the bed). By leveraging TTO and projection initialization, we can achieve the best representation of the input scan as its part decomposition.

We evaluate the effect of synthetic pre-training of the part segmentation in Tab. 3 (*w/o Synthetic Pretrain*). The additional quantity and diversity of data help to avoid overfitting to more limited real data (i.e., very poor results for ‘bed’ and ‘trashcan’ categories due to limited real-world data).

The full-shape constraint helps to maintain consistency between the global shape and the optimized parts during test-time optimization (i.e. not connected box and cover parts for the trash bin, inconsistent joints for the chair and the cabinet). Dense segmentation guides the TTO optimization constraints and prevents self-intersections between parts.

## E. Interpolation properties of learned latent part spaces

In Figure 10, we show the interpolation capabilities of the part latent spaces that we use in NPPs to traverse during test-time optimization. Although each part space has been learned individually, their interpolations can produce consistent shapes.

## F. Part types per category

In Figure 11 we present the shape categories and the corresponding parts that we use in our framework. There are 6 shape categories and 28 part types in total.

## G. Implementation details

We provide further implementation details; note that parameters reported here are for the ‘chair’ category, and other category parameter differences are specified in Table 9.

### G.1. Pretrain decoders

We first train our latent part and shape spaces on the synthetic PartNet [36] dataset. This corresponds to the tasks ‘Train decoder (shape)’, ‘Train decoder (parts)’ in Table 9. The part and shape decoders are all MLPs composed of 8 linear layers of 512 dimensions each, using ReLU nonlinearities with a final tanh for SDF output. The detailed architecture is shown in Tables 14, 15. To train the shape decoder, we use an Adam optimizer with a batch size of 24 and learning rate of  $5e-5$  (‘lr’ in the Table 9) for network weights (with a factor 0.5 (‘lr factor’) and decay interval of 500 epochs (‘lr decay int.’)) and  $1e-4$  for latent parameters (with a factor 0.5 and decay interval of 500 epochs), and train for 2000 epochs. For the part decoder, we extend every part latent with one-hot encoded part type and train the part decoder using an Adam optimizer with a batch size of 48 and learning rate of  $5e-5$  for network weights (with a decay factor of 0.5 and decay interval of 400 epochs) and  $1e-4$  for latent parameters (with a decay factor 0.5 and decay interval of 400 epochs), and train for 2000 epochs.

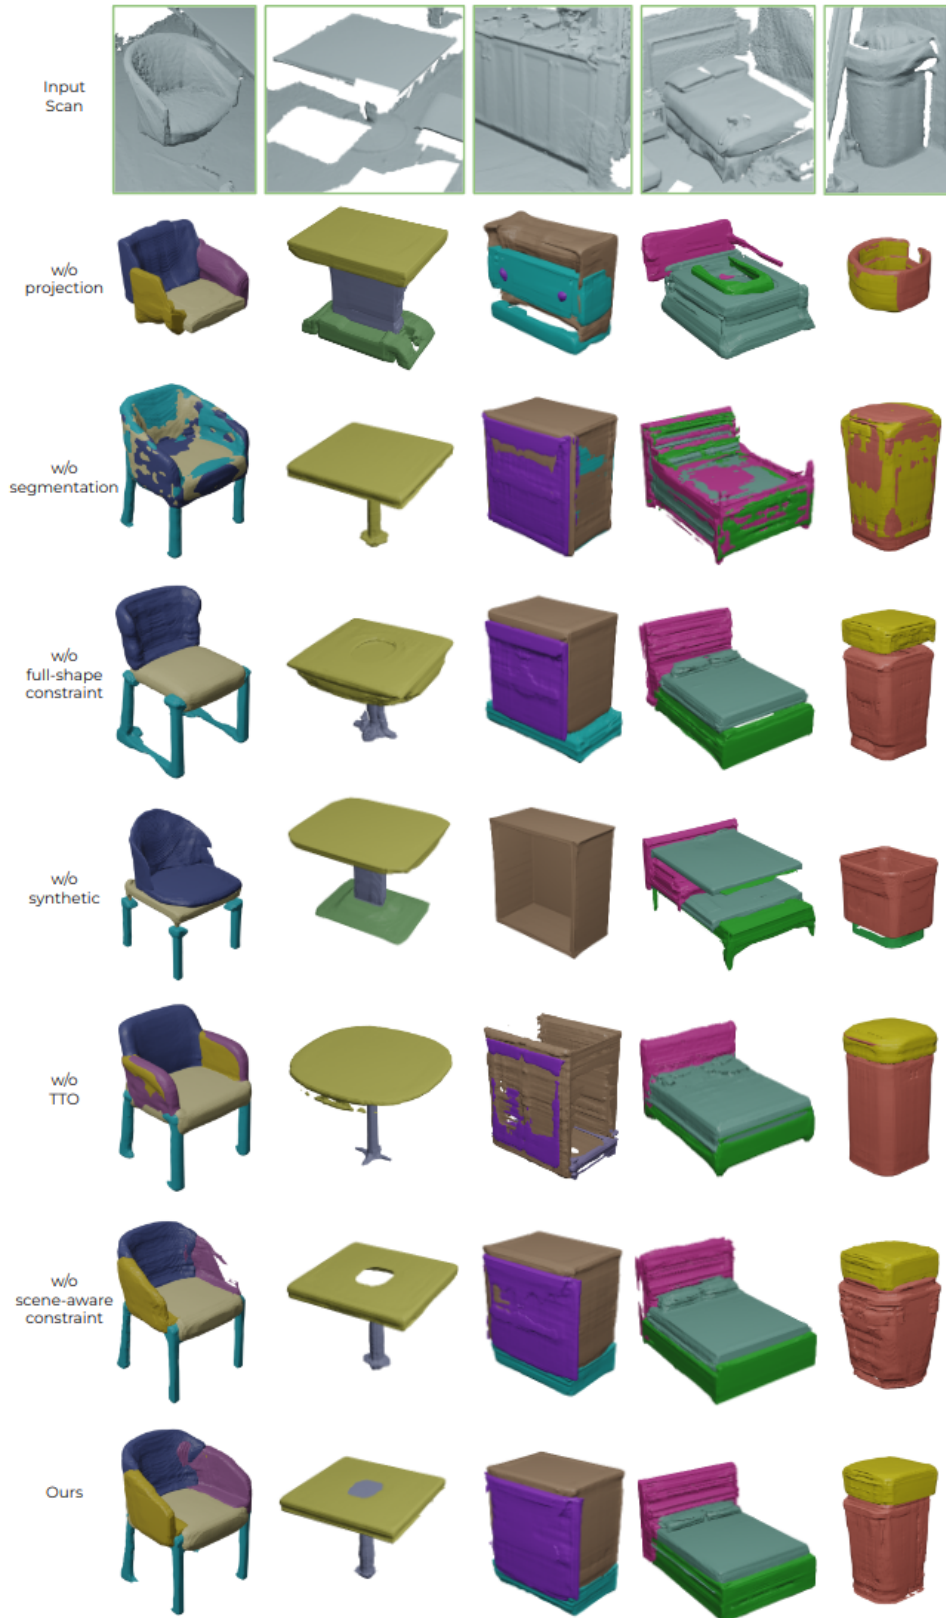

Figure 9. Qualitative ablation results on ScanNet [11] with Scan2CAD [1] and PartNet [36] targets, showing the importance of every design choice in our method.

| Method                | Chamfer Distance ( $\downarrow$ ) – Accuracy |              |              |              |              |              |              |              | Chamfer Distance ( $\downarrow$ ) – Completion |              |              |              |              |              |              |              |
|-----------------------|----------------------------------------------|--------------|--------------|--------------|--------------|--------------|--------------|--------------|------------------------------------------------|--------------|--------------|--------------|--------------|--------------|--------------|--------------|
|                       | chair                                        | table        | cab.         | bkshlf       | bed          | bin          | class avg    | inst avg     | chair                                          | table        | cab.         | bkshlf       | bed          | bin          | class avg    | inst avg     |
| # scenes              | 126 / 189                                    | 30 / 127     | 14 / 94      | 13 / 39      | 14 / 47      | 10 / 74      | 164 / 285    | 164 / 285    | 126 / 189                                      | 30 / 127     | 14 / 94      | 13 / 39      | 14 / 47      | 10 / 74      | 164 / 285    | 164 / 285    |
| # instances           | 764 / 904                                    | 81 / 190     | 32 / 140     | 24 / 54      | 28 / 61      | 18 / 85      | 947 / 1434   | 947 / 1434   | 764 / 904                                      | 81 / 190     | 32 / 140     | 24 / 54      | 28 / 61      | 18 / 85      | 947 / 1434   | 947 / 1434   |
| w/o Scene Consistency | 0.016                                        | 0.055        | <b>0.054</b> | 0.174        | 0.129        | 0.043        | 0.078        | 0.028        | 0.020                                          | 0.065        | <b>0.112</b> | <b>0.225</b> | 0.137        | 0.042        | 0.100        | <b>0.033</b> |
| <b>Ours</b>           | <b>0.011</b>                                 | <b>0.047</b> | 0.057        | <b>0.163</b> | <b>0.101</b> | <b>0.036</b> | <b>0.069</b> | <b>0.023</b> | <b>0.019</b>                                   | <b>0.063</b> | 0.119        | 0.257        | <b>0.099</b> | <b>0.035</b> | <b>0.098</b> | <b>0.033</b> |

Table 8. Ablation study evaluating semantic part completion on Scan2CAD [1] including only the instances affected with Scene Consistency constraints. We also provide information of how many shape instances and scenes are affected with scene-aware constraints for each category.

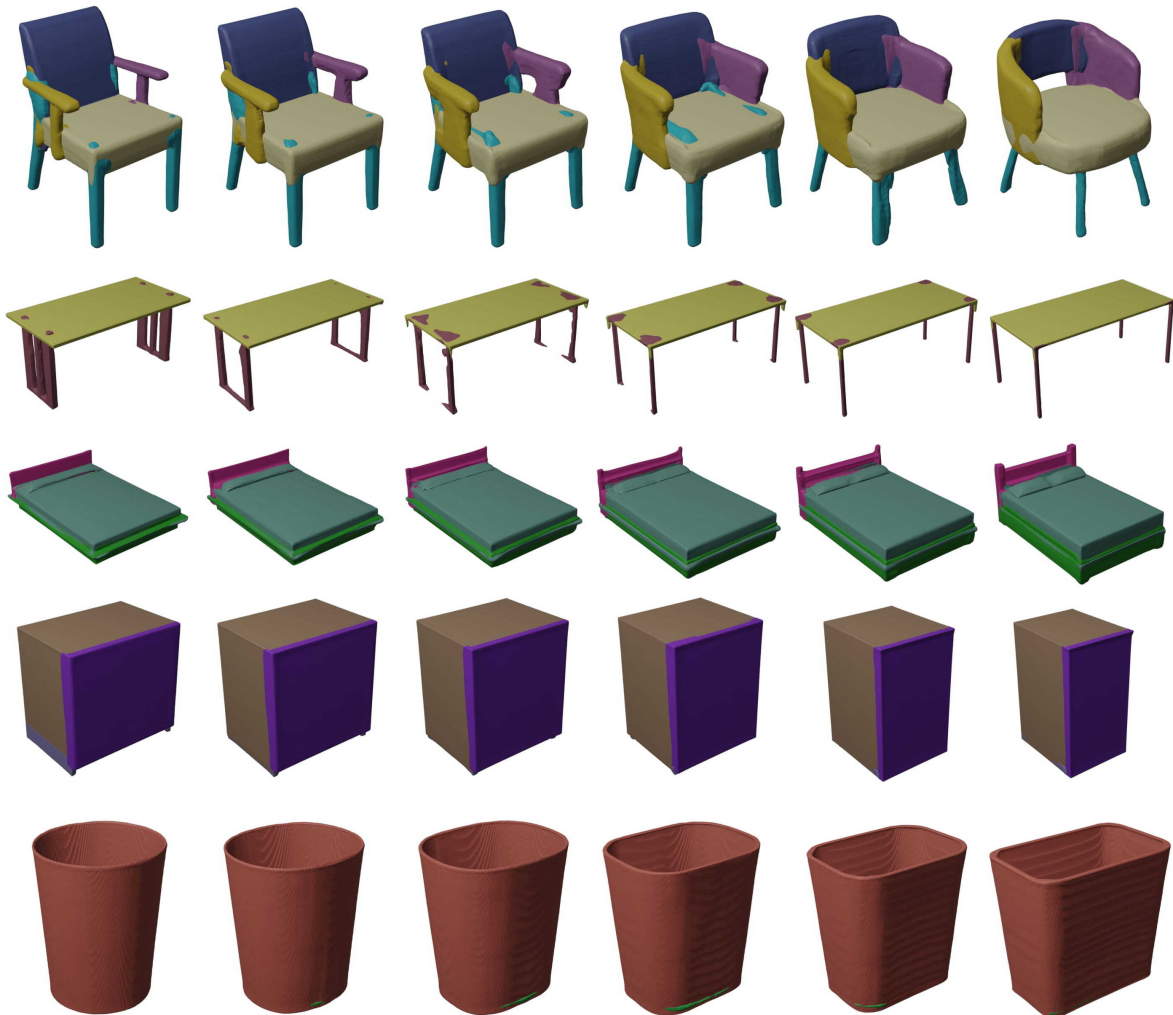

Figure 10. Part interpolations through our learned latent part spaces for different shape classes.

## G.2. Pre-training for latent projection and part segmentation

We then train the projection mapping into the learned part and shape spaces as well as the part segmentation. This part corresponds to the task ‘Train projection’ in Table 9. Our model is pre-trained on synthetic PartNet data using virtually scanned incomplete inputs to take advantage of a large amount of synthetic data. We use an Adam optimizer with

batch size 64 and learning rate  $1e-3$  (‘lr’ in the Table 9) decayed by half (‘lr factor’) every 12 epochs (‘lr decay int.’) for 35 epochs. We use a large and a small PointNet-based [44] network (small (‘PN-small’) and large (‘PN-big’)) to segment an input TSDF into parts and background. We refer to Tables 12, 13 as architectures of ‘PN-small’ and ‘PN-big’ denoted in Table 9.



|                 |                   |                            |
|-----------------|-------------------|----------------------------|
| <b>Chair</b>    | <b>Table</b>      | <b>Cabinet / Bookshelf</b> |
| – seat          | – surface         | – door                     |
| – back          | – shelf           | – shelf                    |
| – left arm      | – pedestal        | – frame                    |
| – right arm     | – central support | – base                     |
| – reg. legs     | – leg             | – countertop               |
| – star legs     | – drawer          |                            |
| – surface base  | – side panel      |                            |
| <b>Trashcan</b> | <b>Bed</b>        |                            |
| – base          | – frame           |                            |
| – bottom        | – side surface    |                            |
| – box           | – sleep area      |                            |
| – cover         | – headboard       |                            |
| – frame         |                   |                            |

Figure 11. Part specifications per category for the parts used in our approach. Note that 'cabinet' and 'bookshelf' have the same set of parts.

### G.3. Fine-tuning on ScanNet data

To apply to real-world observations, we fine-tune the projections and part segmentation on ScanNet [11] data using MLCVNet [55] detections on train scenes. We use an Adam optimizer with batch size 64, learning rate  $2e-4$  ('lr' in the Table 9) decayed by a factor of 0.2 ('lr factor') every 40 epochs ('lr decay int.') for 80 epochs.

### G.4. Test-time optimization

For test-time optimization, we optimize for part and shape codes using an Adam optimizer with learning rate of  $3e-4$  ('lr' in Table 9) for 500 iterations. The learning rate is multiplied by a factor of 0.1 ('lr factor') after 300 iterations ('lr decay int.'). This part corresponds to the task 'Test-time opt.' in Table 9.

To enable more flexibility to capture input details, we enable optimization of the decoder weights for parts and shape after 400 iterations. We have used the first and the second linear layers of part decoder ('part dec. layers opt.') to optimize simultaneously with latent vectors optimization using Adam optimizer with learning rate of  $3e-4$  ('lr') for 100 iterations. The learning rate is multiplied by a factor of 0.1 ('lr factor (part dec.>') after 300 iterations ('lr decay int. (part dec.>').

In Eqs. (5), (6) we use a weight  $w_{trunc}$  for points close to and further away from the surface. We have a set  $\mathcal{A}_{unif.noise}$  of points that have a distance to surface greater than  $d_{trunc} = 0.16m$ . Having decoded the projection of the shape  $\{\tilde{z}^s\}$ , we uniformly sample points around decoded shape no closer than 0.2m to the surface of this shape, and assign truncation distance  $d_{trunc}$  to these points. We also add them to the set  $\mathcal{A}_{unif.noise}$ . For the shape decoder and for the set  $\mathcal{A}_{unif.noise}$  we set  $w_{trunc} = 5.0$  (' $w_{trunc}$  (shape unif. noise)' in the Table 9); for part decoder we set  $w_{trunc} = 20.0$  (' $w_{trunc}$  (parts unif. noise)'). Additionally, while optimizing the particular part  $k$  during test-time optimization we also use the points corresponding to other parts as noise with distance  $d_{trunc}$  and denote this set of points as  $\mathcal{A}_{partnoise}$ . Adding this set into optimization is necessary to decrease intersections between different part geometries after test-time optimization. We set  $w_{trunc} = 5.0$  (' $w_{trunc}$  (part noise)') for this set of points. Finally, in Eq. (4) we use an additional weight for loss consistency term, for which we set  $w_{cons} = 200.0$ .

To encourage geometric completeness during test-time optimization, we sample points with distances to surface from the decoded shape  $\mathcal{S}$  and parts  $\{\mathcal{P}_k\}$  (decoded from  $\{\tilde{z}^s\}$  and  $\{\tilde{z}_k^p\}$ ), and add them to TSDF  $D$  ('add pts. to shape' in the Table 9) or  $\{D^p\}_{p=1}^{N_{parts}}$  ('add pts. to parts')



to the regions where points in  $\mathcal{S}$  or  $\{\mathcal{P}_k\}$  are present and non-background points with distance  $d < d_{trunc}$  in  $D$  and  $\{DP\}_{p=1}^{N_{parts}}$  (which we call *meaningful* points) are missing. We add only those points from  $\mathcal{S}$  and  $\{\mathcal{P}_k\}$  which are not closer than  $d_{thr}$  to meaningful points.

Finally, we scale the coordinates of input TSDF with a scale factor (‘scale factor’) to align better to the learned canonical space of synthetic shapes.

Optimization for each part takes approximately 25 seconds.

### G.5. Hyperparameters search

We determined hyperparameters for training and TTO on a hold-out validation set. There are parameters that affect training and TTO more than others, such as the number of decoder layers to use parameters from for TTO for both shape and part decoders and learning rate for both training and TTO. Parameters of decoder layers enable more flexibility in optimization, but decrease implicit regularization from learned part priors, resulting in less geometry consistency. The proper choice of the learning rate for TTO is important for accurate geometry reconstruction and avoiding unstable optimization. All weights for the loss components in TTO have a wide range of appropriate parameters ( $\pm 20$  for  $w_{trunc}$  and  $\pm 50$  for  $w_{cons}$ ).

### G.6. Network architecture

We also provide extensive information about the architecture of every submodel that we use in our framework. Table 10 shows the architecture of voxel encoder that we use to encode an input occupancy grid. Table 11 shows the architecture of a module that predicts the part decomposition of an input object. The architectures of a small PointNet-like [44] network and a big PointNet-like network that we use to segment an input TSDF are shown in Tables 12, 13. Finally, we provide details about the architecture of shape and parts MLP decoders in Tables 14, 15.

| Task                  | Parameter                       | Chair    | Table  | Cabinet | Bookshelf | Bed    | Trashcan |
|-----------------------|---------------------------------|----------|--------|---------|-----------|--------|----------|
| Train decoder (shape) | # epochs                        | 2000     | 2400   | 8000    | 8000      | 16000  | 16000    |
| Train decoder (shape) | batch size                      | 24       | 24     | 24      | 24        | 24     | 24       |
| Train decoder (shape) | optimizer                       | Adam     | Adam   | Adam    | Adam      | Adam   | Adam     |
| Train decoder (shape) | lr (weights)                    | 5e-5     | 1e-4   | 1e-4    | 1e-4      | 1e-4   | 1e-4     |
| Train decoder (shape) | lr factor (weights)             | 0.5      | 0.5    | 0.5     | 0.5       | 0.5    | 0.5      |
| Train decoder (shape) | lr decay int. (weights)         | 500      | 600    | 1500    | 1500      | 4000   | 3000     |
| Train decoder (shape) | lr (lat.)                       | 1e-4     | 2e-4   | 2e-4    | 2e-4      | 2e-4   | 2e-4     |
| Train decoder (shape) | lr factor (lat.)                | 0.5      | 0.5    | 0.5     | 0.5       | 0.5    | 0.5      |
| Train decoder (shape) | lr decay int. (lat.)            | 500      | 600    | 1500    | 1500      | 4000   | 3000     |
| Train decoder (parts) | # epochs                        | 1100     | 1400   | 2000    | 2000      | 10000  | 10000    |
| Train decoder (parts) | batch size                      | 48       | 48     | 48      | 48        | 48     | 48       |
| Train decoder (parts) | optimizer                       | Adam     | Adam   | Adam    | Adam      | Adam   | Adam     |
| Train decoder (parts) | lr (weights)                    | 5e-5     | 1e-4   | 1e-4    | 1e-4      | 1e-4   | 1e-4     |
| Train decoder (parts) | lr factor (weights)             | 0.5      | 0.5    | 0.5     | 0.5       | 0.5    | 0.5      |
| Train decoder (parts) | lr decay int. (weights)         | 400      | 400    | 800     | 800       | 3600   | 3600     |
| Train decoder (parts) | lr (lat.)                       | 1e-4     | 2e-4   | 2e-4    | 2e-4      | 2e-4   | 2e-4     |
| Train decoder (parts) | lr factor (lat.)                | 0.5      | 0.5    | 0.5     | 0.5       | 0.5    | 0.5      |
| Train decoder (parts) | lr decay int. (lat.)            | 400      | 400    | 800     | 800       | 3600   | 3600     |
| Train projection      | # epochs                        | 35       | 30     | 60      | 60        | 250    | 200      |
| Train projection      | batch size                      | 64       | 64     | 64      | 64        | 64     | 64       |
| Train projection      | optimizer                       | Adam     | Adam   | Adam    | Adam      | Adam   | Adam     |
| Train projection      | lr                              | 1e-3     | 1e-3   | 1e-3    | 1e-3      | 1e-3   | 1e-3     |
| Train projection      | lr factor                       | 0.5      | 0.5    | 0.5     | 0.5       | 0.5    | 0.5      |
| Train projection      | lr decay int.                   | 12       | 20     | 40      | 40        | 150    | 120      |
| Train projection      | segm. network                   | PN-small | PN-big | PN-big  | PN-big    | PN-big | PN-big   |
| Fine-tune             | # epochs                        | 80       | 80     | 120     | 120       | 125    | 70       |
| Fine-tune             | batch size                      | 64       | 64     | 64      | 64        | 64     | 64       |
| Fine-tune             | optimizer                       | Adam     | Adam   | Adam    | Adam      | Adam   | Adam     |
| Fine-tune             | lr                              | 2e-4     | 2e-4   | 2e-4    | 2e-4      | 2e-4   | 2e-4     |
| Fine-tune             | lr factor                       | 0.2      | 0.2    | 0.2     | 0.2       | 0.2    | 0.2      |
| Fine-tune             | lr decay int.                   | 40       | 40     | 60      | 60        | 60     | 40       |
| Test-time opt.        | # iterations                    | 500      | 500    | 500     | 500       | 500    | 500      |
| Test-time opt.        | optimizer                       | Adam     | Adam   | Adam    | Adam      | Adam   | Adam     |
| Test-time opt.        | lr (lat.)                       | 3e-4     | 3e-4   | 3e-4    | 3e-4      | 3e-4   | 3e-4     |
| Test-time opt.        | lr factor (lat.)                | 0.1      | 0.1    | 0.1     | 0.1       | 0.1    | 0.1      |
| Test-time opt.        | lr decay int. (lat.)            | 300      | 300    | 300     | 300       | 300    | 300      |
| Test-time opt.        | shape dec. layers opt.          | -        | -      | -       | -         | 1,2    | 1,2      |
| Test-time opt.        | lr (shape dec.)                 | -        | -      | -       | -         | 1e-4   | 1e-4     |
| Test-time opt.        | lr factor (shape dec.)          | -        | -      | -       | -         | 0.1    | 0.1      |
| Test-time opt.        | lr decay int. (shape dec.)      | -        | -      | -       | -         | 300    | 300      |
| Test-time opt.        | part dec. layers opt.           | 1,2      | 1,2    | 1,2     | 1,2       | -      | -        |
| Test-time opt.        | lr (part dec.)                  | 3e-4     | 3e-4   | 3e-4    | 3e-4      | -      | -        |
| Test-time opt.        | lr factor (part dec.)           | 0.1      | 0.1    | 0.1     | 0.1       | -      | -        |
| Test-time opt.        | lr decay int. (part dec.)       | 300      | 300    | 300     | 300       | -      | -        |
| Test-time opt.        | $w_{trunc}$ (shape unif. noise) | 5.0      | 3.0    | 3.0     | 3.0       | 1.0    | 1.0      |
| Test-time opt.        | $w_{trunc}$ (parts unif. noise) | 20.0     | 12.0   | 12.0    | 12.0      | 1.0    | 5.0      |
| Test-time opt.        | $w_{trunc}$ (part noise)        | 5.0      | 3.0    | 10.0    | 10.0      | 10.0   | 5.0      |
| Test-time opt.        | $w_{cons}$                      | 200.0    | 300.0  | 300.0   | 300.0     | 30.0   | 200.0    |
| Test-time opt.        | add pts. to shape               | ✓        | ✓      | ✓       | ✓         | ✓      | -        |
| Test-time opt.        | dist thr. (shape)               | 0.16m    | 0.16m  | 0.5m    | 0.5m      | 0.75m  | -        |
| Test-time opt.        | add pts. to parts               | -        | ✓      | ✓       | ✓         | ✓      | -        |
| Test-time opt.        | dist thr. (part)                | -        | 0.16m  | 0.5m    | 0.5m      | 0.75m  | -        |
| Test-time opt.        | scale factor                    | 1.2      | 1.2    | 1.1     | 1.1       | 1.2    | 1.2      |

Table 9. Hyperparameters used for training submodels used in our framework.

| Encoder       | Input Layer    | Type       | Input Size       | Output Size      | Kernel Size | Stride    | Padding   |
|---------------|----------------|------------|------------------|------------------|-------------|-----------|-----------|
| conv0         | scan occ. grid | Conv3D     | (1, 32, 32, 32)  | (32, 16, 16, 16) | (5, 5, 5)   | (2, 2, 2) | (2, 2, 2) |
| gnorm0        | conv0          | GroupNorm  | (32, 16, 16, 16) | (32, 16, 16, 16) | -           | -         | -         |
| relu0         | gnorm0         | ReLU       | (32, 16, 16, 16) | (32, 16, 16, 16) | -           | -         | -         |
| pool1         | relu0          | MaxPooling | (32, 16, 16, 16) | (32, 8, 8, 8)    | (2, 2, 2)   | (2, 2, 2) | (0, 0, 0) |
| conv1         | pool1          | Conv3D     | (32, 8, 8, 8)    | (64, 8, 8, 8)    | (3, 3, 3)   | (1, 1, 1) | (1, 1, 1) |
| gnorm1        | conv1          | GroupNorm  | (64, 8, 8, 8)    | (64, 8, 8, 8)    | -           | -         | -         |
| relu1         | gnorm1         | ReLU       | (64, 8, 8, 8)    | (64, 8, 8, 8)    | -           | -         | -         |
| pool2         | relu1          | MaxPooling | (64, 8, 8, 8)    | (64, 4, 4, 4)    | (2, 2, 2)   | (2, 2, 2) | (0, 0, 0) |
| conv2         | pool2          | Conv3D     | (64, 4, 4, 4)    | (128, 2, 2, 2)   | (5, 5, 5)   | (2, 2, 2) | (2, 2, 2) |
| gnorm2        | conv2          | GroupNorm  | (128, 2, 2, 2)   | (128, 2, 2, 2)   | -           | -         | -         |
| relu2         | gnorm2         | ReLU       | (128, 2, 2, 2)   | (128, 2, 2, 2)   | -           | -         | -         |
| pool3         | relu2          | MaxPooling | (128, 2, 2, 2)   | (128, 1, 1, 1)   | (2, 2, 2)   | (2, 2, 2) | (0, 0, 0) |
| conv3         | pool3          | Conv3D     | (128, 1, 1, 1)   | (256, 1, 1, 1)   | (3, 3, 3)   | (1, 1, 1) | (1, 1, 1) |
| gnorm3        | conv3          | GroupNorm  | (256, 1, 1, 1)   | (256, 1, 1, 1)   | -           | -         | -         |
| relu3         | gnorm3         | ReLU       | (256, 1, 1, 1)   | (256, 1, 1, 1)   | -           | -         | -         |
| shape feature | relu3          | Flatten    | (256, 1, 1, 1)   | (256)            | -           | -         | -         |

Table 10. Layer specification for detected object encoder.

| Child decoder       | Input Layer                   | Type         | Input Size                            | Output Size    |
|---------------------|-------------------------------|--------------|---------------------------------------|----------------|
| lin_proj            | shape feature                 | ReLU(Linear) | 256                                   | 256            |
| node feature        | lin_proj                      | ReLU(Linear) | 256                                   | 256            |
| lin0                | node feature                  | Linear       | 256                                   | 2560           |
| relu0               | lin0                          | ReLU         | 2560                                  | 2560           |
| reshape0            | relu0                         | Reshape      | 2560                                  | (10, 256)      |
| node_exist          | reshape0                      | Linear       | (10, 256)                             | (10, 1)        |
| concat0             | (reshape0, reshape0)          | Concat.      | (10, 256), (10, 256)                  | (10, 10, 512)  |
| lin1                | concat0                       | Linear       | (10, 10, 512)                         | (10, 10, 256)  |
| relu1               | lin1                          | ReLU         | (10, 10, 256)                         | (10, 10, 256)  |
| edge_exist          | relu1                         | Linear       | (10, 10, 256)                         | (10, 10, 1)    |
| mp                  | (relu1, edge_exist, reshape0) | Mes. Passing | (10, 10, 256), (10, 10, 1), (10, 256) | (10, 768)      |
| lin2                | mp                            | Linear       | (10, 768)                             | (10, 256)      |
| relu2               | lin2                          | ReLU         | (10, 256)                             | (10, 256)      |
| node_sem            | relu2                         | Linear       | (10, 256)                             | (10, #classes) |
| lin3                | relu2                         | Linear       | (10, 256)                             | (10, 256)      |
| (10, child feature) | lin3                          | ReLU         | (10, 256)                             | (10, 256)      |
| lin4                | node feature                  | ReLU(Linear) | 256                                   | 256            |
| rotation_cls        | lin3                          | Linear       | 256                                   | 12             |

Table 11. Layer specification for decoding an object into its semantic part structure.

| Pts. classifier (small) | Input Layer                        | Type         | Input Size               | Output Size      |
|-------------------------|------------------------------------|--------------|--------------------------|------------------|
| input feature           | (TSDF, node feature, rotation_cls) | Concat.      | (#pts, 4), 256, 12       | (#pts, 272)      |
| lin_cls_0               | input feature                      | ReLU(Linear) | (#pts, 272)              | (#pts, 128)      |
| lin_cls_1               | lin_cls_0                          | ReLU(Linear) | (#pts, 128)              | (#pts, 128)      |
| lin_cls_2               | lin_cls_1                          | ReLU(Linear) | (#pts, 128)              | (#pts, 128)      |
| glob_feat_0             | lin_cls_2                          | MaxPooling1D | (#pts, 128)              | (1, 128)         |
| glob_feat_1             | glob_feat_0                        | Repeat       | (1, 128)                 | (#pts, 128)      |
| lin_cls_3               | (lin_cls_1, glob_feat_1)           | Concat       | (#pts, 128), (#pts, 128) | (#pts, 256)      |
| lin_cls_4               | lin_cls_3                          | ReLU(Linear) | (#pts, 256)              | (#pts, 128)      |
| lin_cls_5               | lin_cls_4                          | ReLU(Linear) | (#pts, 128)              | (#pts, 128)      |
| lin_cls_6               | lin_cls_5                          | Linear       | (#pts, 128)              | (#pts, #classes) |

Table 12. Layer specification for segmenting input TSDF using small PointNet-like network.



| Pts. classifier (big) | Input Layer                           | Type         | Input Size                           | Output Size      |
|-----------------------|---------------------------------------|--------------|--------------------------------------|------------------|
| input feature         | (TSDf, node feature, rotation_cls)    | Concat.      | (#pts, 4), 256, 12                   | (#pts, 272)      |
| lin_cls_0             | input feature                         | ReLU(Linear) | (#pts, 272)                          | (#pts, 256)      |
| lin_cls_1             | lin_cls_0                             | ReLU(Linear) | (#pts, 256)                          | (#pts, 128)      |
| lin_cls_2             | lin_cls_1                             | ReLU(Linear) | (#pts, 128)                          | (#pts, 128)      |
| glob_feat_0           | lin_cls_2                             | MaxPooling1D | (#pts, 128)                          | (1, 128)         |
| glob_feat_1           | glob_feat_0                           | Repeat       | (1, 128)                             | (#pts, 128)      |
| lin_cls_3             | lin_cls_2                             | ReLU(Linear) | (#pts, 128)                          | (#pts, 64)       |
| lin_cls_4             | lin_cls_3                             | ReLU(Linear) | (#pts, 64)                           | (#pts, 64)       |
| glob_feat_2           | lin_cls_4                             | MaxPooling1D | (#pts, 64)                           | (1, 64)          |
| glob_feat_3           | glob_feat_2                           | Repeat       | (1, 64)                              | (#pts, 64)       |
| lin_cls_5             | (lin_cls_1, glob_feat_1, glob_feat_3) | Concat       | (#pts, 128), (#pts, 128), (#pts, 64) | (#pts, 320)      |
| lin_cls_6             | lin_cls_5                             | ReLU(Linear) | (#pts, 320)                          | (#pts, 128)      |
| lin_cls_7             | lin_cls_6                             | ReLU(Linear) | (#pts, 128)                          | (#pts, 64)       |
| lin_cls_8             | lin_cls_7                             | Linear       | (#pts, 64)                           | (#pts, #classes) |

Table 13. Layer specification for segmenting input TSDf using big PointNet-like network.

| Implicit decoder | Input Layer             | Type         | Input Size                           | Output Size          |
|------------------|-------------------------|--------------|--------------------------------------|----------------------|
| lin_proj_0       | node feature            | ReLU(Linear) | 256                                  | 512                  |
| lin_proj_1       | lin_proj_0              | ReLU(Linear) | 512                                  | 512                  |
| lin_proj_2       | lin_proj_1              | ReLU(Linear) | 512                                  | 512                  |
| lin_proj_3       | lin_proj_2              | ReLU(Linear) | 512                                  | 512                  |
| lin_proj_4       | lin_proj_3              | Linear       | 512                                  | 256                  |
| lin_pts_0        | (lin_proj_4, TSDf pts.) | Concat.      | 256, 63                              | 319                  |
| lin_pts_1        | lin_pts_0               | Linear       | 319                                  | 512                  |
| lin_bn_1         | lin_pts_1               | BatchNorm    | 512                                  | 512                  |
| lin_relu_1       | lin_bn_1                | ReLU         | 512                                  | 512                  |
| lin_drop_1       | lin_relu_1              | Dropout      | 512                                  | 512                  |
| lin_pts_2        | lin_pts_1               | Linear       | 512                                  | 512                  |
| lin_bn_2         | lin_pts_2               | BatchNorm    | 512                                  | 512                  |
| lin_relu_2       | lin_bn_2                | ReLU         | 512                                  | 512                  |
| lin_drop_2       | lin_relu_2              | Dropout      | 512                                  | 512                  |
| lin_pts_3        | lin_pts_2               | Linear       | 512                                  | 512                  |
| lin_bn_3         | lin_pts_3               | BatchNorm    | 512                                  | 512                  |
| lin_relu_3       | lin_bn_3                | ReLU         | 512                                  | 512                  |
| lin_drop_3       | lin_relu_3              | Dropout      | 512                                  | 512                  |
| lin_pts_4        | lin_pts_3               | Linear       | 512                                  | 512 - dim(lin_pts_0) |
| lin_bn_4         | lin_pts_4               | BatchNorm    | 512 - dim(lin_pts_0)                 | 512 - dim(lin_pts_0) |
| lin_relu_4       | lin_bn_4                | ReLU         | 512 - dim(lin_pts_0)                 | 512 - dim(lin_pts_0) |
| lin_drop_4       | lin_relu_4              | Dropout      | 512 - dim(lin_pts_0)                 | 512 - dim(lin_pts_0) |
| lin_pts_5        | (lin_pts_0, lin_drop_4) | Concat.      | dim(lin_pts_0), 512 - dim(lin_pts_0) | 512                  |
| lin_bn_5         | lin_pts_5               | BatchNorm    | 512                                  | 512                  |
| lin_relu_5       | lin_bn_5                | ReLU         | 512                                  | 512                  |
| lin_drop_5       | lin_relu_5              | Dropout      | 512                                  | 512                  |
| lin_pts_6        | lin_pts_5               | Linear       | 512                                  | 512                  |
| lin_bn_6         | lin_pts_6               | BatchNorm    | 512                                  | 512                  |
| lin_relu_6       | lin_bn_6                | ReLU         | 512                                  | 512                  |
| lin_drop_6       | lin_relu_6              | Dropout      | 512                                  | 512                  |
| lin_pts_7        | lin_pts_6               | Linear       | 512                                  | 512                  |
| lin_bn_7         | lin_pts_7               | BatchNorm    | 512                                  | 512                  |
| lin_relu_7       | lin_bn_7                | ReLU         | 512                                  | 512                  |
| lin_drop_7       | lin_relu_7              | Dropout      | 512                                  | 512                  |
| lin_pts_8        | lin_pts_7               | Linear       | 512                                  | 1                    |
| lin_tanh_7       | lin_pts_8               | Tanh         | 1                                    | 1                    |

Table 14. Layer specification for implicit shape decoder.

| Implicit decoder | Input Layer                                | Type         | Input Size                           | Output Size          |
|------------------|--------------------------------------------|--------------|--------------------------------------|----------------------|
| lin_proj_0       | child feature                              | ReLU(Linear) | 256                                  | 512                  |
| lin_proj_1       | lin_proj_0                                 | ReLU(Linear) | 512                                  | 512                  |
| lin_proj_2       | lin_proj_1                                 | ReLU(Linear) | 512                                  | 512                  |
| lin_proj_3       | lin_proj_2                                 | ReLU(Linear) | 512                                  | 512                  |
| lin_proj_4       | lin_proj_3                                 | Linear       | 512                                  | 256                  |
| lin_pts_0        | (lin_proj_4, part cls. one-hot, TSDF pts.) | Concat.      | 256, #parts, 63                      | 319 + #parts         |
| lin_pts_1        | lin_pts_0                                  | Linear       | 319 + #parts                         | 512                  |
| lin_bn_1         | lin_pts_1                                  | BatchNorm    | 512                                  | 512                  |
| lin_relu_1       | lin_bn_1                                   | ReLU         | 512                                  | 512                  |
| lin_drop_1       | lin_relu_1                                 | Dropout      | 512                                  | 512                  |
| lin_pts_2        | lin_pts_1                                  | Linear       | 512                                  | 512                  |
| lin_bn_2         | lin_pts_2                                  | BatchNorm    | 512                                  | 512                  |
| lin_relu_2       | lin_bn_2                                   | ReLU         | 512                                  | 512                  |
| lin_drop_2       | lin_relu_2                                 | Dropout      | 512                                  | 512                  |
| lin_pts_3        | lin_pts_2                                  | Linear       | 512                                  | 512                  |
| lin_bn_3         | lin_pts_3                                  | BatchNorm    | 512                                  | 512                  |
| lin_relu_3       | lin_bn_3                                   | ReLU         | 512                                  | 512                  |
| lin_drop_3       | lin_relu_3                                 | Dropout      | 512                                  | 512                  |
| lin_pts_4        | lin_pts_3                                  | Linear       | 512                                  | 512 - dim(lin_pts_0) |
| lin_bn_4         | lin_pts_4                                  | BatchNorm    | 512 - dim(lin_pts_0)                 | 512 - dim(lin_pts_0) |
| lin_relu_4       | lin_bn_4                                   | ReLU         | 512 - dim(lin_pts_0)                 | 512 - dim(lin_pts_0) |
| lin_drop_4       | lin_relu_4                                 | Dropout      | 512 - dim(lin_pts_0)                 | 512 - dim(lin_pts_0) |
| lin_pts_5        | (lin_pts_0, lin_drop_4)                    | Concat.      | dim(lin_pts_0), 512 - dim(lin_pts_0) | 512                  |
| lin_bn_5         | lin_pts_5                                  | BatchNorm    | 512                                  | 512                  |
| lin_relu_5       | lin_bn_5                                   | ReLU         | 512                                  | 512                  |
| lin_drop_5       | lin_relu_5                                 | Dropout      | 512                                  | 512                  |
| lin_pts_6        | lin_pts_5                                  | Linear       | 512                                  | 512                  |
| lin_bn_6         | lin_pts_6                                  | BatchNorm    | 512                                  | 512                  |
| lin_relu_6       | lin_bn_6                                   | ReLU         | 512                                  | 512                  |
| lin_drop_6       | lin_relu_6                                 | Dropout      | 512                                  | 512                  |
| lin_pts_7        | lin_pts_6                                  | Linear       | 512                                  | 512                  |
| lin_bn_7         | lin_pts_7                                  | BatchNorm    | 512                                  | 512                  |
| lin_relu_7       | lin_bn_7                                   | ReLU         | 512                                  | 512                  |
| lin_drop_7       | lin_relu_7                                 | Dropout      | 512                                  | 512                  |
| lin_pts_8        | lin_pts_7                                  | Linear       | 512                                  | 1                    |
| lin_tanh_7       | lin_pts_8                                  | Tanh         | 1                                    | 1                    |

Table 15. Layer specification for implicit part decoder.
